# Supplementary material for: Predictors of COVID-19 Vaccine Hesitancy: Socio-Demographics, Co-Morbidity, and Past Experience of Racial Discrimination
Source: MDPI journal article supplement (doi:10.3390/vaccines9070767), 2021-07-09
Supplement: s1 [file s1]

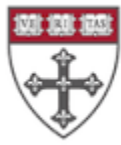

**HARVARD**  
**T.H. CHAN**

**SCHOOL OF PUBLIC HEALTH**

Emergency Preparedness Research,  
Evaluation, and Practice Program

## Vaccine Hesitancy Survey

December 2020

For reproduction contact [preparedness@hsph.harvard.edu](mailto:preparedness@hsph.harvard.edu)

**\* 1. Are you a worker in any of the following categories?**

- ☐ Hospital and emergency department workers
- ☐ Nursing home, long-term care, and home health care workers
- ☐ Public health workers
- ☐ Emergency Medical Services workers
- ☐ Correctional facilities workers
- ☐ Sanitation workers
- ☐ Vaccine manufacturing workers
- ☐ Vaccine distribution workers
- ☐ Other health care workers
- ☐ Pharmacy workers
- ☐ Teachers and school staff (including childcare and K-12)
- ☐ Food processing workers
- ☐ Grocery store workers
- ☐ Postal and shipping workers
- ☐ Public transportation workers
- ☐ Private transportation workers

- ☐ Police or firefighters
- ☐ Other first responders
- ☐ Volunteer (i.e. CERT, MRC, Red Cross, etc.)
- ☐ Other (please specify)

\*Screening question

### **Tell us about you ....**

**\* 2. Do you work in the healthcare sector?**

- ☐ Yes
- ☐ No

Continue to tell us about you ....

**\* 3. Which title best represents you?**

- ☐ Physician (MD or DO only) or Physician Assistant (PA)
- ☐ Nurse (RN), Nurse Practitioner (NP), Certified Nurse Midwife (CNM), or Other Nurse Professional (e.g. Licensed Practical Nurse (LPN), Certified Nursing Assistants/Aides (CNA), etc.)
- ☐ Dentist or Other Dental Professional
- ☐ Pharmacist
- ☐ Social Worker/Mental Health Professional
- ☐ Other (please specify)

**\* 4. What is your age category?**

- ☐ 18-24
- ☐ 25-34
- ☐ 35-44
- ☐ 45-54
- ☐ 55-64
- ☐ 65-74
- ☐ 75+

**\* 5. What is your gender?**

- ☐ Male
- ☐ Female
- ☐ Prefer to specify (please specify)

**\* 6. In what state or U.S. territory do you live? [if you do not live in the USA select the option "other country" at the end of the list]**

**7. What is your zip code? (use 00000 for outside the U.S.)**

**\* 8. What language(s) do you usually speak at home? [check all that apply]**

- ☐ English
- ☐ Spanish
- ☐ French or French Creole
- ☐ Vietnamese
- ☐ Filipino
- ☐ Portuguese or Portuguese Creole
- ☐ Chinese
- ☐ Other (please specify)

**\* 9. What race/ethnicity do you consider yourself?**

- ☐ White, Non-Hispanic
- ☐ Black, Non-Hispanic
- ☐ Asian, Non-Hispanic
- ☐ 2+ races
- ☐ Hispanic
- ☐ Prefer not to say
- ☐ Other (please specify)

\* 10. What is the highest level of schooling you have completed?

- ☐ Less than high school
- ☐ High school/GED
- ☐ Some college
- ☐ Bachelor's degree
- ☐ Post-graduate degree (i.e. Master, PhD, MD, etc)
- ☐ Other (please specify)

\* 11. Select the employment status that best describes your current situation [select one option only]:

- ☐ I am working - paid employee
- ☐ I am working - self-employed
- ☐ I am not working - on unemployment
- ☐ I am not working - on paid leave or furloughed
- ☐ I am not working - searching for work
- ☐ I am retired
- ☐ I am not working - on disability or worker's comp
- ☐ I am not working - and not looking for a job
- ☐ Other (please specify)

\* 12. During the past 12 weeks did you experience difficulties in affording food or medical care?

- ☐ Yes
- ☐ No

\* 13. Do you have any of the following conditions ? [check all that apply]

- ☐ Cancer
- ☐ Severe allergies
- ☐ Seizures
- ☐ Immunocompromised state due to therapy or disease
- ☐ Autoimmune disease
- ☐ Obesity
- ☐ Diabetes (type 1 or 2)
- ☐ Cardiovascular disease
- ☐ Pulmonary disease
- ☐ Rheumatological condition
- ☐ Pregnancy

- ☐ I do not have any medical condition  
☐ Other (please specify)

\* 14. How concerned are you about any of the following situations?:

|                                                                                                                                                             | Very concerned        | Somewhat concerned    | Not concerned         |
|-------------------------------------------------------------------------------------------------------------------------------------------------------------|-----------------------|-----------------------|-----------------------|
| <b>Contracting COVID-19 at work?</b> (For example: hospital, office, and other work settings that are not your home)                                        | <input type="radio"/> | <input type="radio"/> | <input type="radio"/> |
| <b>Contracting COVID-19 outside of work?</b> (For example: at the grocery store, when you are using transportation, or in other aspects of your daily life) | <input type="radio"/> | <input type="radio"/> | <input type="radio"/> |
| <b>Infecting your family or friends with COVID-19?</b>                                                                                                      | <input type="radio"/> | <input type="radio"/> | <input type="radio"/> |

Your experience ....

\* 15. Have you been diagnosed with COVID-19?

\* 16. Did any of your close family members or friends experience any of the following? [Check all that apply]:

- ☐ Tested positive for COVID-19 and had no symptoms or mild symptoms  
☐ Tested positive for COVID-19 and had severe symptoms  
☐ Died of COVID-19  
☐ Lost their job or had a salary reduction due to COVID-19  
☐ None of my close family or friends experience any of the above situations

\* 17. We are interested in the way other people have treated you. Can you tell us if any of the following situations ever happened to you at any time in your life?: [Check all that apply]

- ☐ You were unfairly fired or denied a job  
☐ You were unfairly stopped, searched, questioned, physically threatened or abused by the police  
☐ You were unfairly discouraged by a teacher or advisor from continuing your education  
☐ You were unfairly prevented from moving into a neighborhood because the landlord or a realtor refused to sell or rent you a house or apartment

- ☐ You were unfairly denied a bank loan
- ☐ You received a service at a restaurant that was worse than what other people received
- ☐ You were unfairly treated by a doctor or nurse
- ☐ None of the above situations have ever happened to me

**18. If any of the above situations happened to you do you think it was due to any of the following reasons?**

- ☐ Your race
- ☐ Your sexual orientation
- ☐ Your gender
- ☐ Your religion
- ☐ Other reason (please specify)

**\* 19. What do you think about the number of cases of COVID-19 reported in your state?**

- ☐ The number of cases being reported is much lower than the actual number of cases
- ☐ The number of cases being reported is much greater than the actual number of cases
- ☐ The number of cases being reported is somewhat accurate
- ☐ I don't know

**\* 20. Have you received the Flu vaccine this year? [check only one option]**

- ☐ Yes
- ☐ No, but I will get it
- ☐ No, and do not plan to get it (explain why)

**21. Were you ever recommended a vaccine by a healthcare provider that you did not take?**

- ☐ Yes
- ☐ No
- ☐ I do not remember

**22. If you did not take the vaccine that was recommended to you, what was/were the reason(s)? [check all reasons that applied to that situation]**

- ☐ I did not think it was necessary
- ☐ I did not have enough information about the vaccine
- ☐ I did not think the vaccine was effective
- ☐ The vaccine was too expensive
- ☐ It was not logistically convenient
- ☐ I did not think the vaccine was safe
- ☐ I was concerned about the side effects

- ☐ I had a prior bad experience with vaccinations
- ☐ I was afraid of needles
- ☐ For religious reasons
- ☐ Other (please specify)

**\* 23. Tell us how well the following statements describe your reactions and thoughts:**

|                                                                          | Very concerned        | Somewhat concerned    | Not concerned         |
|--------------------------------------------------------------------------|-----------------------|-----------------------|-----------------------|
| I feel anxious when I see the number of COVID-19 cases climbing          | <input type="radio"/> | <input type="radio"/> | <input type="radio"/> |
| I find the prospect of a vaccine exciting                                | <input type="radio"/> | <input type="radio"/> | <input type="radio"/> |
| I feel depressed about the uncertainty of how this pandemic will evolve  | <input type="radio"/> | <input type="radio"/> | <input type="radio"/> |
| I get upset when I hear contradictory information about COVID-19         | <input type="radio"/> | <input type="radio"/> | <input type="radio"/> |
| I feel stressed when I am unable to plan my life due to COVID-19         | <input type="radio"/> | <input type="radio"/> | <input type="radio"/> |
| I think that taking chances is part of life and so is taking the vaccine | <input type="radio"/> | <input type="radio"/> | <input type="radio"/> |

## Information about the vaccine ...

**\* 24. Have you heard about a COVID-19 vaccine**

- ☐ Yes, and it was mostly positive
- ☐ Yes, and it was mostly negative
- ☐ Yes, and it was neither positive or negative
- ☐ No

...continue on information

**\* 25. Did you get information about the COVID-19 vaccine from social media ? [check all that apply]**

- ☐ No, I did not
- ☐ I am not sure
- ☐ Yes - from Facebook
- ☐ Yes - from YouTube
- ☐ Yes - from Instagram
- ☐ Yes - from TikTok
- ☐ Yes - from Twitter
- ☐ Other social media (please specify which one)



## Social media use ...

**26. Did the information you got from social media change your level of confidence in the COVID-19 vaccine?**

- ☐ Increased my confidence in the vaccine
- ☐ Decreased my confidence in the vaccine
- ☐ Did not change my confidence
- ☐ I am not sure
- ☐ Did not change my confidence but influenced my opinion in other ways - please specify

**27. Did you ever share information on social media about the COVID-19 vaccine?**

- ☐ Yes
- ☐ No
- ☐ I do not remember

.... trust in information

**\* 28. Where did you get the most information about the COVID-19 vaccine? Select up to 3 SOURCES:**

- ☐ Local television news (on TV or on the web)
- ☐ English language national or cable network news (on TV or on the web)
- ☐ Non-English language television station (on TV or on the web)
- ☐ National newspaper (i.e. New York Times, Wall Street Journal, USA Today on paper or on the web)
- ☐ My town or other local newspaper (on paper or on the web)
- ☐ Non-English language newspaper (on paper or on the web)
- ☐ English language radio
- ☐ Non-English language radio
- ☐ News portal site such as Yahoo! or MSN
- ☐ Website of a government agency
- ☐ Social media
- ☐ Word of mouth
- ☐ Through my employer
- ☐ Other (please specify)

**\* 29. How much do you trust the information you got so far about the COVID-19 vaccine?**

- ☐ Not at all
- ☐ Very little
- ☐ Somewhat
- ☐ A lot

**\* 30. Who would you trust the most to give you information about the COVID-19 vaccine in the near future? Select your TOP 3 choices:**

- ☐ Federal officials
- ☐ Your state officials
- ☐ Your town leaders (mayor or board of selectmen)
- ☐ Public health experts
- ☐ Your employer
- ☐ Your co-workers
- ☐ Your doctor
- ☐ Your local pharmacy
- ☐ Your family and friends
- ☐ Your community health center
- ☐ A celebrity (for example: a sports figure, actor, or musician)
- ☐ Local leaders in my community not in government positions (for example: local organizations, religious leaders)
- ☐ Other (please specify)

|  |
|--|
|  |
|--|

## Your opinions ...

**\* 31. If you were offered a COVID-19 vaccine within two months from now - at no cost to you- how likely are you to take it?**

- ☐ Very likely
- ☐ Somewhat likely
- ☐ I am not sure
- ☐ Somewhat unlikely
- ☐ Very unlikely
- ☐ I would not take it within 2 months but would consider it later on

**\* 32. Select the top 3 locations you would trust the most to get the COVID-19 vaccine:**

- ☐ Doctor's office
- ☐ Local pharmacy
- ☐ Urgent care center
- ☐ Hospital
- ☐ Community health center
- ☐ Local health department
- ☐ School
- ☐ Church
- ☐ Military facility
- ☐ Community center
- ☐ Local park or community outdoor space
- ☐ Any location
- ☐ None of the above
- ☐ Other (please specify)

confidence

**\* 33. What would be important for you to know to make you more likely to take the COVID-19 vaccine?**

**Select up to 3 options**

- ☐ The fast production of the vaccine did not compromise its safety
- ☐ Those approving the vaccines are following strict rules
- ☐ My risk of getting sick with COVID-19 is bigger than the risk of side effects from the vaccine
- ☐ The vaccine cannot cause any immediate or long term injury
- ☐ It is impossible to get COVID-19 or any other disease from the vaccine itself or its components
- ☐ The vaccine works in protecting me from COVID-19
- ☐ The vaccine works in stopping the transmission of COVID-19 from one person to another
- ☐ The FDA, CDC, and WHO recommend the vaccine and agree it is safe
- ☐ Other (please specify)

**\* 34. What else ..... would be important for you to know to make you more likely to take the COVID-19 vaccine? Select up to 3 options**

- ☐ Once vaccinated I will be able to live my life with no restrictions
- ☐ Those with concerns about the vaccine have opportunities to share their opinions with the public
- ☐ Pharmaceutical companies will not make large profits from the vaccine
- ☐ Everybody will have equal access to the vaccine regardless of income, race, or insurance status
- ☐ I will be free to choose if I get the vaccine or not with no consequences
- ☐ There is no other reason why we have so many people sick (i.e. 5G technology or other factors we do not know about)
- ☐ Other (please specify)

**35. If you have other opinions about the vaccine you would like to share please write them here;**

**Thank you !**

**Thank you for taking this survey!**
